# Supplementary material for: Characterization of the Highly Efficient Acid-Stable Xylanase and β-Xylosidase System from the Fungus Byssochlamys spectabilis ATHUM 8891 (Paecilomyces variotii ATHUM 8891)
Source: J Fungi (Basel). 2021 May 29;7(6):430. doi: 10.3390/jof7060430 (PMC8228849; doi:10.3390/jof7060430)
Supplement: Supplementary file 1 [file jof-07-00430-s001.zip › Tables S1 & S2_ B_spectabilis_fragments_against_Thermoascaceae_genomes_proteomes_2021_01_02.xlsx]

## Sheet: Sheet1
			Table S1: Complete LS-MS/MS data of the Xyd3A and Xyn11A fragments. Proteins are identified in Thermoascaceae genomes using local tblastn and an e value cut-off of 0.001.
sequenced fragments			Byssochlamys genomes																																								Other Thermoascaceae genomes
	code_name	sequence	Byssochlamys spectabilis strain MTDF-01					Byssochlamys spectabilis strain CBS 101075					Byssochlamys spectabilis strain CBS 144490 HYG1					Byssochlamys spectabilis No. 5					Byssochlamys sp. AF001					Byssochlamys sp. IMV 00045					Byssochlamys sp. BYSS01					Byssochlamys nivea strain Cornell orchards no. 7					Thermoascaceae sp. COH1141 Aspergillus_niger_strain_COH1141_contaminant-1034, whole genome					Thermoascus crustaceus DNA JCM 12817
			GenBank Acc. No	translated aligned sequence	alignment length	e value	bitscore	GenBank Acc. No	translated aligned sequence	alignment length	e value	bitscore	GenBank Acc. No	translated aligned sequence	alignment length	e value	bitscore	GenBank Acc. No	translated aligned sequence	alignment length	e value	bitscore	GenBank Acc. No	translated aligned sequence	alignment length	e value	bitscore	GenBank Acc. No	translated aligned sequence	alignment length	e value	bitscore	genbank ID	translated aligned sequence	alignment length	e value	bitscore	genbank ID	translated aligned sequence	alignment length	e value	bitscore	GenBank Acc. No	translated aligned sequence	alignment length	e value	bitscore	GenBank Acc. No	translated aligned sequence
β-Xylosidase fragments	P_varxyd1	RTLINQIASIIAIQGRA	gb|CM012220.1|	RTLINQIASIIAIQGRA	17	0.000178	37	gb|RCNU01000007.1|	RTLINQIASIIAIQGRA	17	0.000178	37	gb|RHLL01000116.1|	RTLINQIASIIAIQGRA	17	0.000178	37	dbj|BAUL01000286.1|	RTLINQIASIIAIQGRA	17	0.000178	37						ND	ND	ND	ND	ND	ND	ND	ND	ND	ND	gb|QEIL01000066.1|	RTLINQIASIIAIQGRA	17	0.000178	37	gb|QBDR01000014.1|	RTLINQIASIIAIQGRA	17	4.12e-05	37	dbj|BCIC01000002.1|	RTLINQIASIISTQGRA
	P_varxyd2	RAFNNAGRYGLDSYAPNINGFRS	gb|CM012220.1|	RAFNNAGRYGLDSYAPNINGFRS	23	4.97e-09	50.1	gb|RCNU01000007.1|	RAFNNAGRYGLDSYAPNINGFRS	23	4.82e-09	50.1	gb|RHLL01000116.1|	RAFNNAGRYGLDSYAPNINGFRS	23	4.33e-09	50.4	dbj|BAUL01000286.1|	RAFNNAGRYGLDSYAPNINGFRS	23	4.61e-09	50.4	gb|PNEM01000004.1|	RAFNNAGRYGLDSYAPNINGFRS	23	5.06e-09	50.1	gb|MSJI02000171.1|	RAASNAGKYGLDVYSPNINGFRS	23	5.34e-06	41.6	ND	ND	ND	ND	ND	gb|QEIL01000066.1|	RAFNNAGRYGLDSYAPNINGFRS	23	4.82e-09	50.1	gb|QBDR01000014.1|	RAFNNAGRYGLDSYAPNINGFRS	23	1.13e-09	50.1	dbj|BCIC01000002.1|	RAFNNAGRYGLDVYAPNINGFRS
	P_varxyd3	RYGLDSYAPNINGFRS	gb|CM012220.1|	RYGLDSYAPNINGFRS	16	0.000148	37	gb|RCNU01000007.1|	RYGLDSYAPNINGFRS	16	0.000148	37	gb|RHLL01000116.1|	RYGLDSYAPNINGFRS	16	0.000145	37	dbj|BAUL01000286.1|	RYGLDSYAPNINGFRS	16	0.000143	37	gb|PNEM01000004.1|	RYGLDSYAPNINGFRS	16	0.000153	37	ND	ND	ND	ND	ND	ND	ND	ND	ND	ND	gb|QEIL01000066.1|	RYGLDSYAPNINGFRS	16	0.000142	37	gb|QBDR01000014.1|	RYGLDSYAPNINGFRS	16	3.43e-05	37	dbj|BCIC01000002.1|	RYGLDVYAPNINGFRS
	P_varxyd4	KHFAGYDLENWDGHSRL	gb|CM012220.1|	KHFAGYDLENWDGHSRL	17	9.1e-07	43.5	gb|RCNU01000007.1|	KHFAGYDLENWDGHSRL	17	1.02e-06	43.1	gb|RHLL01000116.1|	KHFAGYDLENWDGHSRL	17	9.37e-07	43.5	dbj|BAUL01000286.1|	KHFAGYDLENWDGHSRL	17	1.74e-06	42.7	gb|PNEM01000004.1|	KHFAGYDLEDWDGHSRL	17	5.95e-06	41.2	gb|MSJI02000171.1|	KHFAGYDIESWHNHSRL	17	0.000518	35.4	ND	ND	ND	ND	ND	gb|QEIL01000066.1|	KHFAGYDLENWDGHSRL	17	1.31e-06	43.1	gb|QBDR01000014.1|	KHFAGYDLENWDGHSRL	17	2.59e-07	43.1	dbj|BCIC01000002.1|	KHFAGYDLENWGGHSRL
	P_varxyd5	RSFMCSYNAVNGVPSCANPWLLQTLLRE	gb|CM012220.1|	RSFMCSYNAVNGVPSCANPWLLQTLLRE	28	9.66e-14	63.9	gb|RCNU01000007.1|	RSFMCSYNAVNGVPSCANPWLLQTLLRE	28	9.56e-14	63.9	gb|RHLL01000116.1|	RSFMCSYNAVNGVPSCANPWLLQTLLRE	28	9.56e-14	63.9	dbj|BAUL01000286.1|	RSFMCSYNAVNGVPSCANPWLLQTLLRE	28	8.37e-14	63.9	gb|PNEM01000004.1|	RSFMCSYNSVNGVPSCANPFLLQTLLRE	28	4.61e-12	58.9	gb|MSJI02000626.1|	SFMCTYNELNGRPTCADPWLLNDVLRE	27	1.51e-08	49.3	ND	ND	ND	ND	ND	gb|QEIL01000066.1|	RSFMCSYNAVNGVPSCANPFFLQTLLRE	28	4.53e-12	59.3	gb|QBDR01000014.1|	RSFMCSYNAVNGVPSCANPWLLQTLLRE	28	2.01e-14	63.9	dbj|BCIC01000002.1|	RSIMCSYNAVNGVPSCSNSFFLQTLLRD
	P_varxyd6	RLYSNLVRV	ND	ND	ND	ND	ND	ND	ND	ND	ND	ND	ND	ND	ND	ND	ND	ND	ND	ND	ND	ND	ND	ND	ND	ND	ND	ND	ND	ND	ND	ND	ND	ND	ND	ND	ND	ND	ND	ND	ND	ND	gb|QBDR01000014.1|	RVGYFDGNDTEYRK	14	0.000382	33.9	ND	ND
	P_varxyd8	RVGYFDGNDTEYRKL	gb|CM012220.1|	RVGYFDGNDTEYRKL	15	0.000306	36.2	gb|RCNU01000007.1|	RVGYFDGNDTEYRKL	15	0.0003	36.2	gb|RHLL01000116.1|	RVGYFDGNDTEYRKL	15	0.000306	36.2	dbj|BAUL01000286.1|	RVGYFDGNDTEYRKL	15	0.000389	35.8	gb|PNEM01000004.1|	RVGYFDGNDTEYRKL	15	0.000399	35.8	ND	ND	ND	ND	ND	ND	ND	ND	ND	ND	ND	ND	ND	ND	ND	gb|QBDR01000014.1|	RVGYFDGNDTEYRKL	15	8.63e-05	35.8	ND	ND
	P_varxyd9	KTDAQNISYEAAVEGIVLLKN	gb|CM012220.1|	KTDAQNISYEAAVEGIVLLKN	21	6.7e-07	43.9	gb|RCNU01000007.1|	KTDAQNISYEAAVEGIVLLKN	21	6.7e-07	43.9	gb|RHLL01000116.1|	KTDAQNISYEAAVEGIVLLKN	21	6.64e-07	43.9	dbj|BAUL01000286.1|	KTDAQNISYEAAVEGIVLLKN	21	7.06e-07	43.9	gb|PNEM01000004.1|	QSDAWNISYEAAAEGIVLLKN	21	0.000373	36.2	gb|MSJI02000915.1|	TDAWNISYEAAVEGIVLLKN	20	3.95e-05	38.9	ND	ND	ND	ND	ND	ND	ND	ND	ND	ND	gb|QBDR01000014.1|	KTDAQNISYEAAVEGIVLLKN	21	1.55e-07	43.9	dbj|BCIC01000002.1|	TDAWNISYEAAVEGITLLKN
	P_varxyd10	KNDGTLPLSKK	ND	ND	ND	ND	ND	ND	ND	ND	ND	ND	ND	ND	ND	ND	ND	ND	ND	ND	ND	ND	ND	ND	ND	ND	ND	ND	ND	ND	ND	ND	ND	ND	ND	ND	ND	gb|QEIL01000066.1|	KSDAWNISYEAAVEGIVLLKN	21	2.83e-05	39.3	ND	ND	ND	ND	ND	ND	ND
Xylanase fragments	P_varxyn1	RVNEPSIQGTATFNQYWSVR	gb|CM012219.1|	RVNEPSIEGTATFNQYWSVR	20	5.88e-07	44.3	gb|RCNU01000019.1|	RDNDPSIVGTATFDQYWSVR	20	0.000112	37.7	gb|RHLL01000099.1|	RVNEPSIEGTATFNQYWSVR	20	5.03e-07	44.3	dbj|BAUL01000080.1|	QVNQPSISGTATFNQYWSIR	20	1.79e-05	40	gb|PNEM01000005.1|	RVNEPSIQGTATFNQYWSIR	20	2.69e-07	45.1	gb|MSJI02000523.1|	RVNAPSIIGTATFPQYWSVR	20	0.000169	37.4	ND	ND	ND	ND	ND	gb|QEIL01000294.1|	RVNQPSIVGTATFNQYWSIR	20	8.89e-06	40.8	gb|QBDR01000002.1|	RVNDPSIVGTATFDQYWSVR	20	3.84e-06	40	gb|QBDR01000004.1|	QVNQPSISGTATFNQYWSIR
			Table S2: Complete LS-MS/MS data of Xyd3A and Xyn11A fragments. Proteins are identified in Thermoascaceae proteomes using local blastp for oligopeptides and an e value cut-off of 0.001. For every individual search, only the hits with the best scores are shown.
sequenced fragments			Byssochlamys proteomes
	code_name	sequence	Byssochlamys spectabilis strain CBS 101075					Byssochlamys spectabilis No. 5
			GenBank Acc. No	aligned sequence	alignment length	e value	bitscore	GenBank Acc. No	aligned sequence	alignment length	e value	bitscore
β-Xylosidase fragments	P_varxyd1	RTLINQIASIIAIQGRA	RWQ94829.1	RTLINQIASIIAIQGRA	17	17	56.2	GAD99233.1	RTLINQIASIIAIQGRA	17	3.53e-12	57.1
	P_varxyd2	RAFNNAGRYGLDSYAPNINGFRS		RAFNNAGRYGLDSYAPNINGFRS	23	4.3e-08	49.8		RAFNNAGRYGLDSYAPNINGFRS	23	4.3e-08	49.8
	P_varxyd3	RYGLDSYAPNINGFRS		RYGLDSYAPNINGFRS	16	5e-05	36.7		RYGLDSYAPNINGFRS	16	5e-05	36.7
	P_varxyd4	KHFAGYDLENWDGHSRL		KHFAGYDLENWDGHSRL	17	2.79e-13	60		KHFAGYDLENWDGHSRL	17	3.28e-13	60
	P_varxyd5	RSFMCSYNAVNGVPSCANPWLLQTLLRE		RSFMCSYNAVNGVPSCANPWLLQTLLRE	28	4.19e-14	64.7		RSFMCSYNAVNGVPSCANPWLLQTLLRE	28	3.61e-14	65.1
	P_varxyd7	RVGYFDGNDTEYRK		RVGYFDGNDTEYRK	14	1.78e-09	48.6		RVGYFDGNDTEYRK	14	4.1e-08	48.1
	P_varxyd8	RVGYFDGNDTEYRKL		RVGYFDGNDTEYRKL	15	2.48e-10	51.1		RVGYFDGNDTEYRKL	15	3.12e-10	51.1
	P_varxyd9	KTDAQNISYEAAVEGIVLLKN		KTDAQNISYEAAVEGIVLLKN	21	4.03e-15	66.4		KTDAQNISYEAAVEGIVLLKN	21	1e-07	45.2
	P_varxyd10	KNDGTLPLSKK		KNDGTLPLSKK	11	2.43e-05	36.3		KNDGTLPLSKK	11	2.43e-05	36.3
Xylanase fragments	P_varxyn1	RVNEPSIQGTATFNQYWSVR	RWQ91582.1	RDNDPSIVGTATFDQYWSVR	20	2.45e-05	38.4	GAD94166.1	QVNQPSISGTATFNQYWSIR	20	2.02e-05	38.4
[truncated: 3 more columns]
